# Supplementary material for: Wheat seed embryo excision enables the creation of axenic seedlings and Koch’s postulates testing of putative bacterial endophytes
Source: PubMed Central journal article supplement (PMC4858700; doi:10.1038/srep25581), 2016-05-06
Supplement: srep25581-s1.pdf [file srep25581-s1.pdf]

# Wheat seed embryo excision enables the creation of axenic seedlings and Koch's postulates testing of putative bacterial endophytes

Rebekah J Robinson, Bart A Fraaije, Ian M Clark, Robert W Jackson, Penny R Hirsch & Tim H Mauchline

## Supplementary Figure 1A and 1B

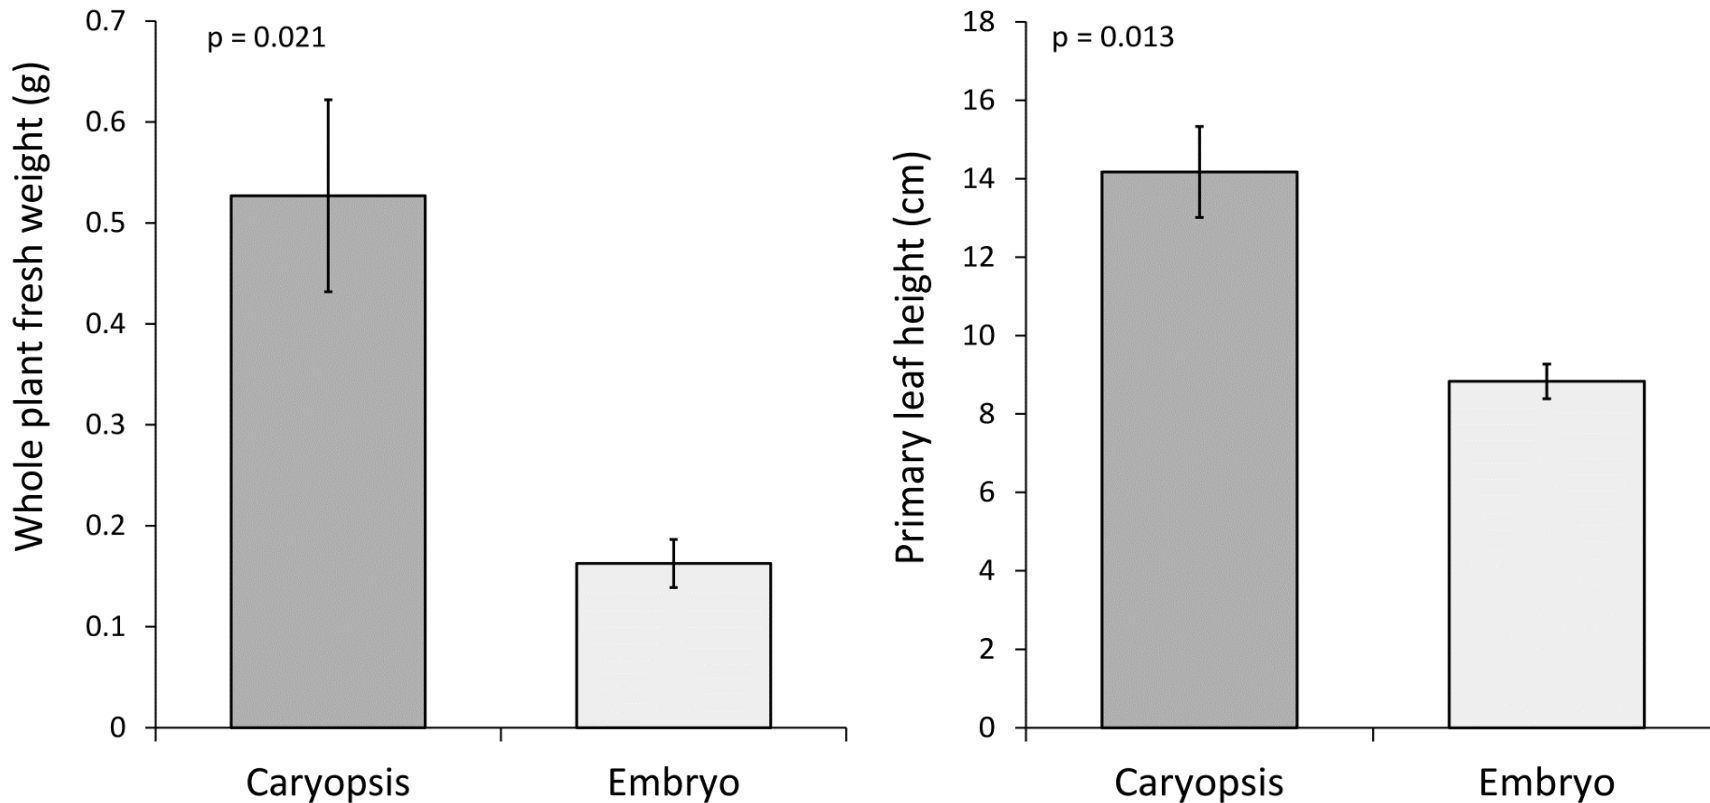

**Supplementary Figure 1** Comparative growth of wheat seedlings grown from whole caryopses and excised embryos. A. Mean whole plant fresh weight. B. Mean primary leaf height. Mean values are calculated from 3 biological replicates (9 seedlings) at 3 weeks post imbibition. Significant differences are indicated with star ( $p < 0.05$ , two sample t-test). C. Growth at 3 weeks post imbibition i) Seed grown seedlings ii) Embryo grown seedlings

# Wheat seed embryo excision enables the creation of axenic seedlings and Koch's postulates testing of putative bacterial endophytes

Rebekah J Robinson, Bart A Fraaije, Ian M Clark, Robert W Jackson, Penny R Hirsch & Tim H Mauchline

## Supplementary Figure 2

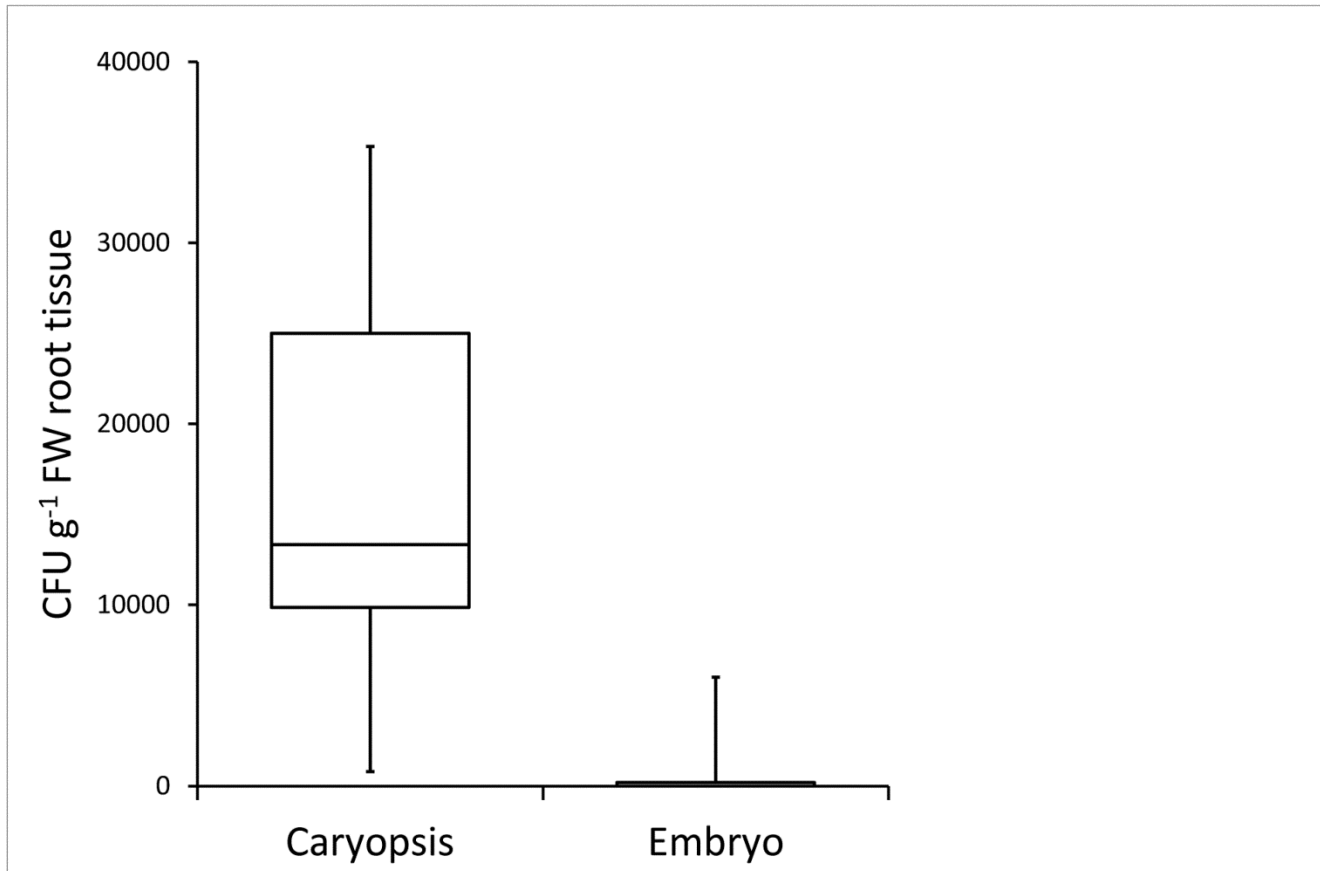

**Supplementary Figure 2** Abundance of endophytes recovered from surface sterile root tissue of wheat seedlings grown from whole caryopses and excised embryos. Endophyte abundance measured in 9 biological replicates (3 seedlings in each biological unit). Box limits indicate Q1, median and Q3 values; whiskers indicate maximum and minimum values. Mann Whitey U,  $p < 0.01$ .
